# Supplementary material for: Storage Effects on Bioactive Phenols in Calabrian Monovarietal Extra Virgin Olive Oils Based on the EFSA Health Claim
Source: MDPI journal article supplement (doi:10.3390/foods12203799), 2023-10-17
Supplement: s1 [file s1]

## Storage Effects on Bioactive Phenols in Calabrian Monovarietal Extra Virgin Olive Oils Based on the EFSA Health Claim

Marialaura Frisina, Sonia Bonacci \*, Manuela Oliverio, Monica Nardi,  
Thomas Patrizio Vatrano and Antonio Procopio

Department of Health Science, University Magna Græcia of Catanzaro, 88100 Catanzaro, Italy

**Figure S1.** Images from <https://www.olimonovarietali.it/en/region-detail/?regione=CALABRIA>.

page 2

**Figure S2.** Full Scan (a) chromatogram obtained by UHPLC-ESI-HRMS for the VN sample and extracted ion chromatograms of detected EVOO phenols hydroxytyrosol (b), oleacein (c), oleocanthal (d) and oleuropein aglycon (e).

page 2

**Table S1.** Evolution of total phenol content ( $\text{mg kg}^{-1}$ ) in Nocellara del Belice (VN) and Dolce di Rossano (VDR) monovarietal EVOO samples.

page 3

**Table S2.** Evolution of total considered biophenols during twelve months of storage expressed as mg of *EVOO phenols* per 20 g in Nocellara di Belice (VN) and Dolce di Rossano (VDR) monovarietal EVOO samples ( $\text{mg/ 20 g}$ ).

page 3

**Figure S3.** Correlation of the peak area obtained by UHPLC-ESI-HRMS and analytical standard concentration of hydroxytyrosol (a); tyrosol (b); verbascoside (c); oleacein (d); oleuropein (e); oleocanthal (f) and oleuropein aglycon (g).

page 4

**Table S3.** Linearity validation results of the analytical method by UHPL-ESI-HRMS.

page 5

**Table S4.** Statistical and analytical parameters: variation coefficient ( $\text{CV}_r$ ); limit of repeatability ( $r$ ); percentage recovery ( $R$ ) and extended uncertainty ( $U_e$ ) for each considered concentrations ( $\text{mg g}^{-1}$ ).

page 5

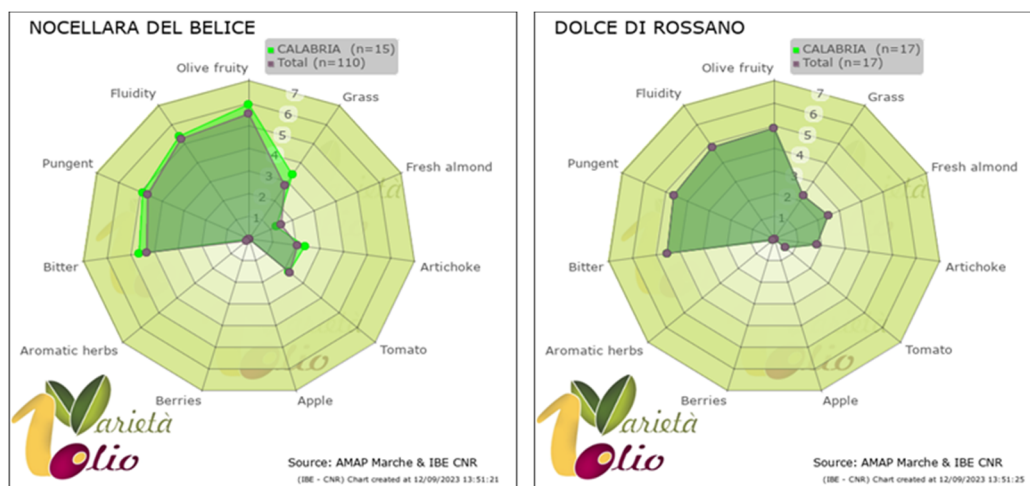

**Figure S1.** Images from <https://www.olimonovarietali.it/en/region-detail/?regione=CALABRIA>.

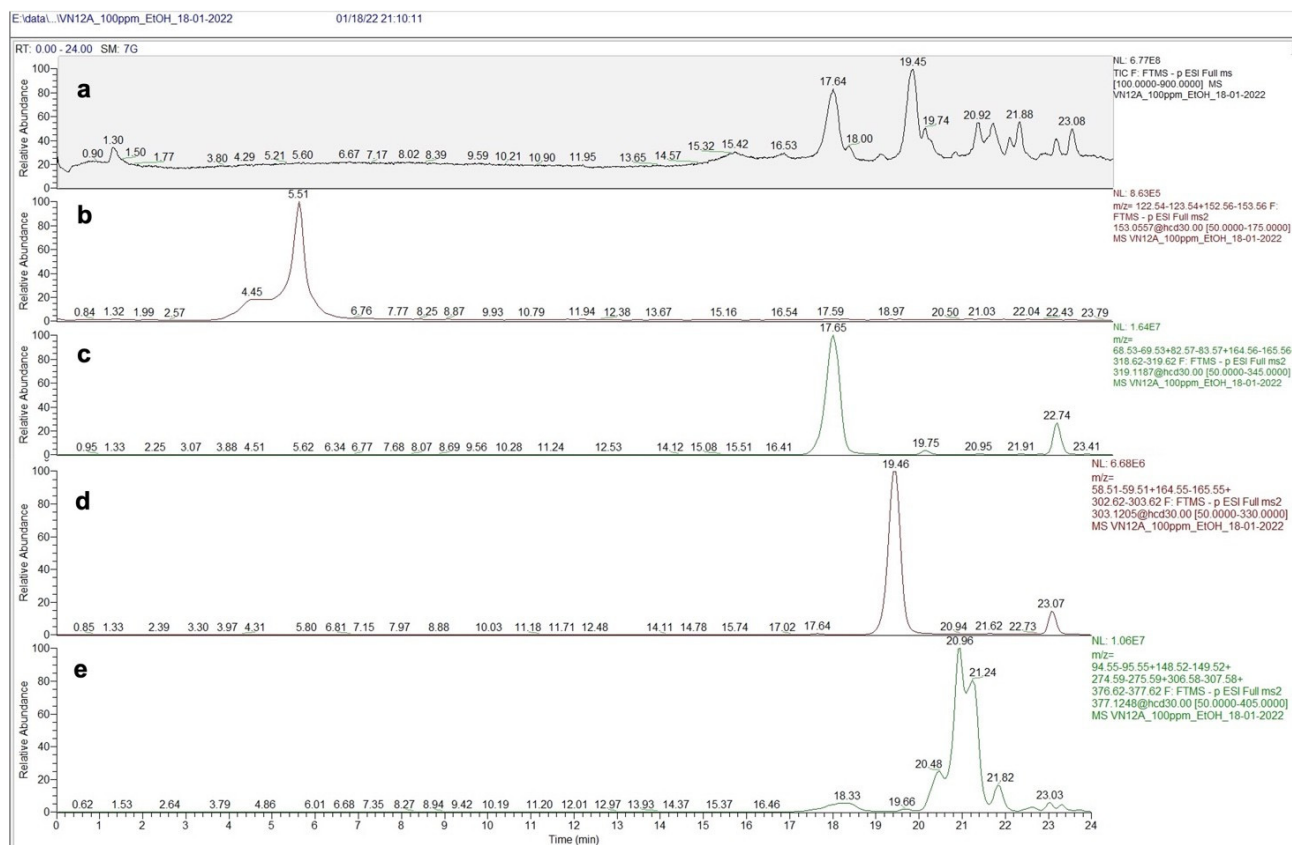

**Figure S2.** Full Scan (a) chromatogram obtained by UHPLC-ESI-HRMS for the VN sample and extracted ion chromatograms of detected EVOO phenols hydroxytyrosol (b), oleacein (c), oleocanthal (d) and oleuropein aglycon (e).

**Table S1.** Evolution of total phenol content ( $\text{mg kg}^{-1} \pm \text{SD}$ ) in Nocellara del Belice (VN) and Dolce di Rossano (VDR) monovarietal EVOO samples evaluated by spectrophotometric assay (Folin-Ciocalteu) during storage time (months).

|           | VN* ( $\text{mg kg}^{-1} \pm \text{SD}$ ) | VDR* ( $\text{mg kg}^{-1} \pm \text{SD}$ ) |
|-----------|-------------------------------------------|--------------------------------------------|
| February  | 472.34 $\pm$ 9.48                         | 566.98 $\pm$ 18.52                         |
| March     | 552.72 $\pm$ 15.76                        | 486.65 $\pm$ 16.46                         |
| April     | 475.40 $\pm$ 15.49                        | 501.22 $\pm$ 22.71                         |
| May       | 486.61 $\pm$ 10.99                        | 486.63 $\pm$ 10.39                         |
| June      | 532.66 $\pm$ 12.46                        | 429.53 $\pm$ 8.47                          |
| July      | 523.85 $\pm$ 13.12                        | 554.22 $\pm$ 15.45                         |
| August    | 506.68 $\pm$ 20.46                        | 569.72 $\pm$ 14.19                         |
| September | 510.35 $\pm$ 11.24                        | 340.91 $\pm$ 23.15                         |
| October   | 529.31 $\pm$ 12.51                        | 513.36 $\pm$ 15.12                         |
| November  | 511.14 $\pm$ 19.45                        | 624.09 $\pm$ 21.46                         |
| December  | 509.48 $\pm$ 10.82                        | 535.69 $\pm$ 10.24                         |
| January   | 499.54 $\pm$ 17.51                        | 555.11 $\pm$ 14.58                         |

\*Data are expressed as means standard deviations (SD) of tree independent observations.

**Table S2.** Evolution of total considered EVOO phenols during twelve months of storage expressed as mg of EVOO phenols per 20 g in *Nocellara di Belice* (VN) and *Dolce di Rossano* (VDR) monovarietal EVOO samples ( $\text{mg/ 20 g}$ ).

|           | VN*              | VDR*             |
|-----------|------------------|------------------|
| February  | 29.58 $\pm$ 1.16 | 41.43 $\pm$ 2.29 |
| March     | 29.04 $\pm$ 1.61 | 40.78 $\pm$ 2.31 |
| April     | 28.69 $\pm$ 0.78 | 38.64 $\pm$ 1.50 |
| May       | 28.00 $\pm$ 1.17 | 35.83 $\pm$ 2.26 |
| June      | 27.80 $\pm$ 1.43 | 35.72 $\pm$ 2.80 |
| July      | 27.46 $\pm$ 1.17 | 34.04 $\pm$ 2.51 |
| August    | 27.04 $\pm$ 1.02 | 34.35 $\pm$ 2.89 |
| September | 26.85 $\pm$ 1.11 | 34.19 $\pm$ 2.26 |
| October   | 26.26 $\pm$ 0.91 | 33.19 $\pm$ 1.27 |
| November  | 25.82 $\pm$ 0.91 | 28.04 $\pm$ 1.64 |
| December  | 25.40 $\pm$ 0.99 | 28.06 $\pm$ 1.30 |
| January   | 25.10 $\pm$ 0.95 | 28.16 $\pm$ 1.52 |

\*Data are expressed as means and standard deviations (SD) of three independent observations.

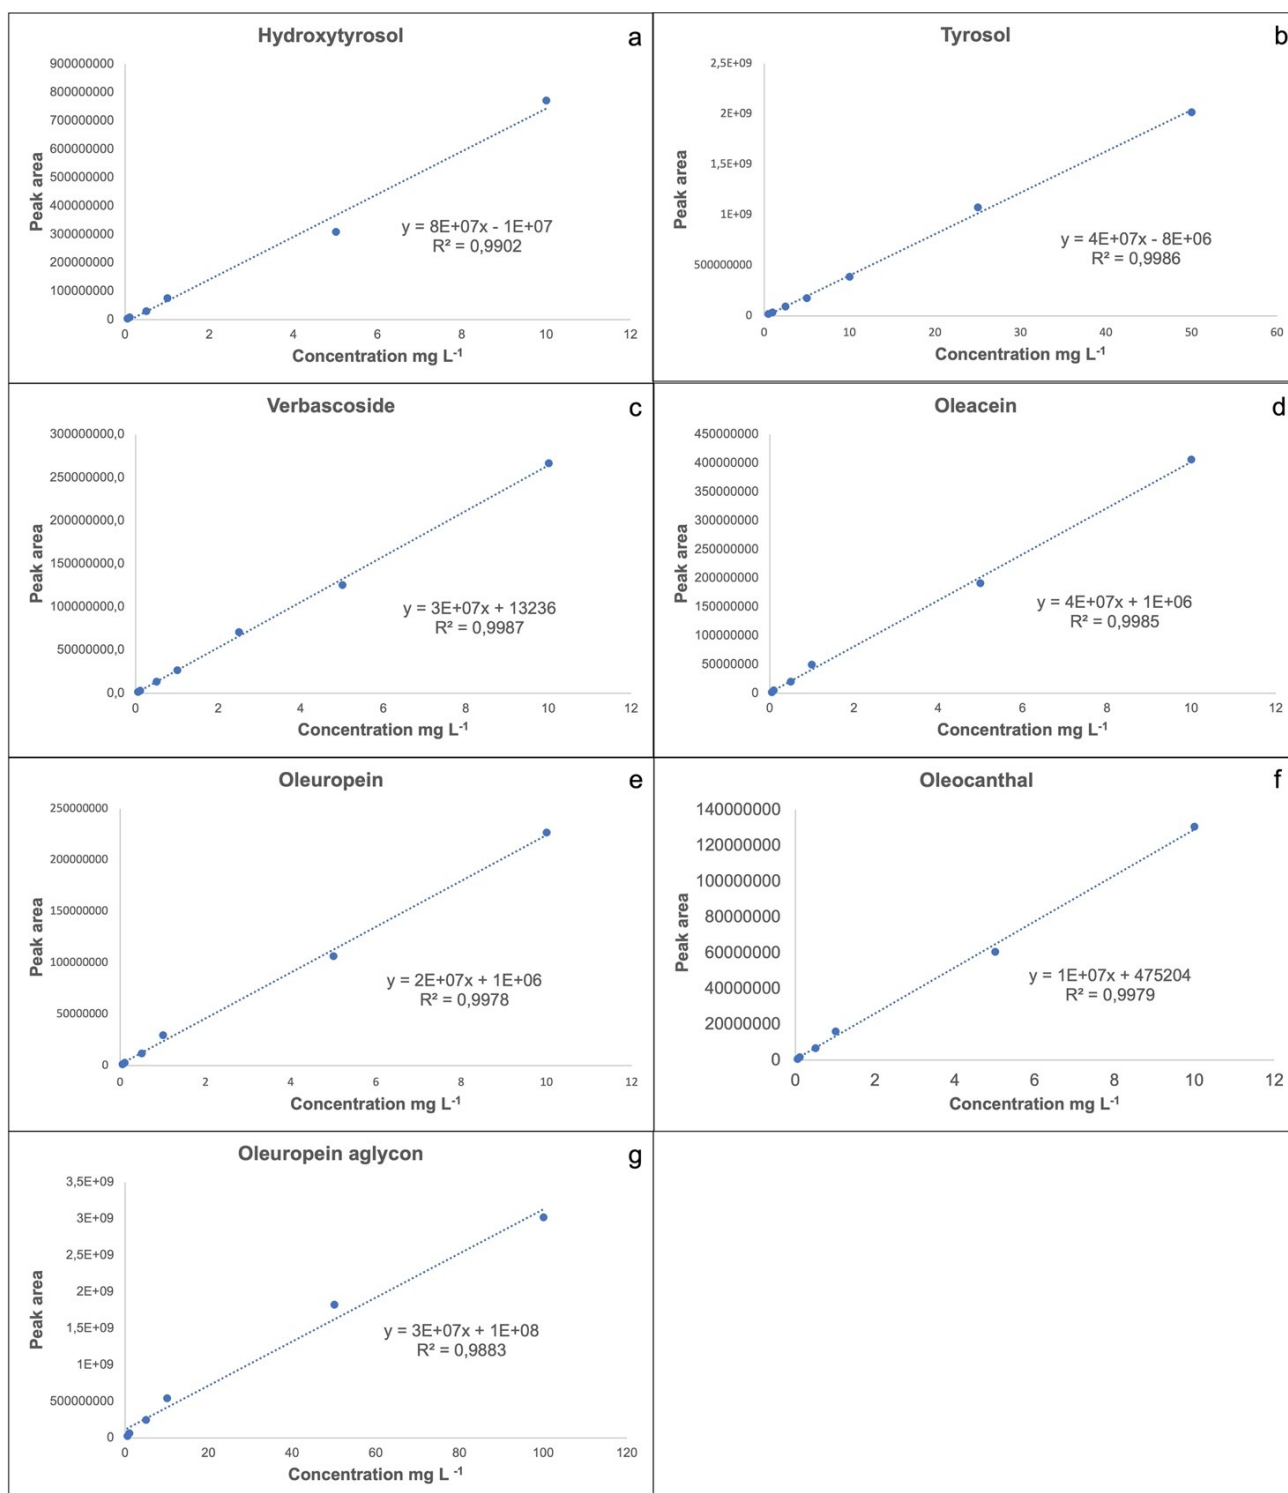

**Figure S3.** Correlation of the peak area obtained by UHPLC-ESI-HRMS and analytical standard concentration of hydroxytyrosol (a); tyrosol (b); verbascoside (c); oleacein (d); oleuropein (e); oleocanthal (f) and oleuropein aglycon (g).

**Table S3.** Linearity validation results of the analytical method by UHPL-ESI-HRMS.

| Compounds           | Concentration range (mg L <sup>-1</sup> ) | Calibration curve | R <sup>2</sup> |
|---------------------|-------------------------------------------|-------------------|----------------|
| Hydroxytyrosol      | 0.05-10                                   | Y=8E+07X-1E+07    | 0.9902         |
| Tyrosol             | 0.5- 50                                   | Y=4E+07X-8E+06    | 0.9986         |
| Verbascoside        | 0.05-10                                   | Y=3E+07X+13236    | 0.9987         |
| Oleacein            | 0.05-10                                   | Y=4E+07X+1E+06    | 0.9985         |
| Oleuropein          | 0.05-10                                   | Y=2E+07X+1E+06    | 0.9978         |
| Oleocanthal         | 0.05-10                                   | Y=1E+07X+475204   | 0.9979         |
| Oleuropein aglycone | 0.5-100                                   | Y=3E+07X+1E+08    | 0.9983         |

**Table S4.** Statistical and analytical parameters: variation coefficients (CV<sub>r</sub> and CV<sub>R</sub>); limit of repeatability (r); percentage recovery (R) and extended uncertainty (U<sub>e</sub>) for each considered concentrations (mg g<sup>-1</sup>).

|                           | mg g <sup>-1</sup> | CV <sub>r</sub> (%) | CV <sub>R</sub> (%) | r (%) | R (%) | U <sub>e</sub> (%) |
|---------------------------|--------------------|---------------------|---------------------|-------|-------|--------------------|
| <b>Hydroxytyrosol</b>     | 0.033              | 2.3                 | 2.9                 | 7.2   | 94    | 25                 |
|                           | 0.037              | 6.1                 | 7.2                 | 19.4  | 109   | 20                 |
|                           | 0.047              | 6.6                 | 7.3                 | 20.8  | 93    | 33                 |
| <b>Tyrosol</b>            | 0.37               | 2.9                 | 3.5                 | 9.8   | 97    | 32                 |
|                           | 0.58               | 6.8                 | 7.7                 | 20.7  | 96    | 36                 |
|                           | 0.75               | 3.3                 | 3.9                 | 10.5  | 96    | 31                 |
| <b>Verbascoside</b>       | 0.003              | 9.3                 | 9.9                 | 29.0  | 97    | 29                 |
|                           | 0.007              | 8.8                 | 9.7                 | 27.8  | 98    | 18                 |
|                           | 0.015              | 1.9                 | 2.6                 | 7.3   | 104   | 22                 |
| <b>Oleacein</b>           | 0.09               | 1.7                 | 2.4                 | 5.5   | 94    | 33                 |
|                           | 0.13               | 7.5                 | 8.0                 | 24.0  | 108   | 31                 |
|                           | 0.28               | 5.7                 | 6.3                 | 18.2  | 99    | 29                 |
| <b>Oleuropein</b>         | 0.002              | 9.7                 | 10.9                | 32.0  | 89    | 38                 |
|                           | 0.005              | 9.0                 | 9.4                 | 28.8  | 104   | 20                 |
|                           | 0.013              | 2.1                 | 2.8                 | 6.2   | 95    | 23                 |
| <b>Oleocanthal</b>        | 0.16               | 5.0                 | 5.4                 | 6.9   | 93    | 38                 |
|                           | 0.23               | 5.8                 | 6.6                 | 18.7  | 93    | 39                 |
|                           | 0.53               | 4.4                 | 5.2                 | 14.2  | 97    | 26                 |
| <b>Oleuropein aglycon</b> | 0.36               | 3.1                 | 3.9                 | 9.9   | 98    | 36                 |
|                           | 0.53               | 6.8                 | 7.2                 | 21.9  | 95    | 34                 |
|                           | 0.72               | 3.2                 | 3.7                 | 10.2  | 96    | 33                 |
